# Supplementary material for: Effects of high-pressure processing on taste-related ATP breakdown compounds and aroma volatiles in grass-fed beef during vacuum aging
Source: PubMed Central journal article supplement — Asian-Australas J Anim Sci. 2018 Mar 13;31(8):1336–44. doi: 10.5713/ajas.17.0677 (PMC6043434; doi:10.5713/ajas.17.0677), 2018-03-13

**Supplementary Material 1.** Proximate composition of grass-fed beef strip loin subjected to different levels of pressure

| Composition (%) | Pressure (MPa)     |                    |                    | SEM  | <i>p</i> value |
|-----------------|--------------------|--------------------|--------------------|------|----------------|
|                 | 0.1                | 300                | 500                |      |                |
| Moisture        | 76.51 <sup>a</sup> | 76.12 <sup>a</sup> | 72.65 <sup>b</sup> | 0.53 | <0.001         |
| Crude fat       | 3.38               | 3.34               | 3.57               | 0.18 | 0.919          |
| Crude protein   | 19.12 <sup>b</sup> | 19.51 <sup>b</sup> | 22.73 <sup>a</sup> | 0.76 | 0.001          |
| Ash             | 0.99               | 1.03               | 1.04               | 0.02 | 0.110          |

SEM, standard error of the mean

<sup>a-b</sup> Means within each row are significantly different ( $p < 0.05$ ).

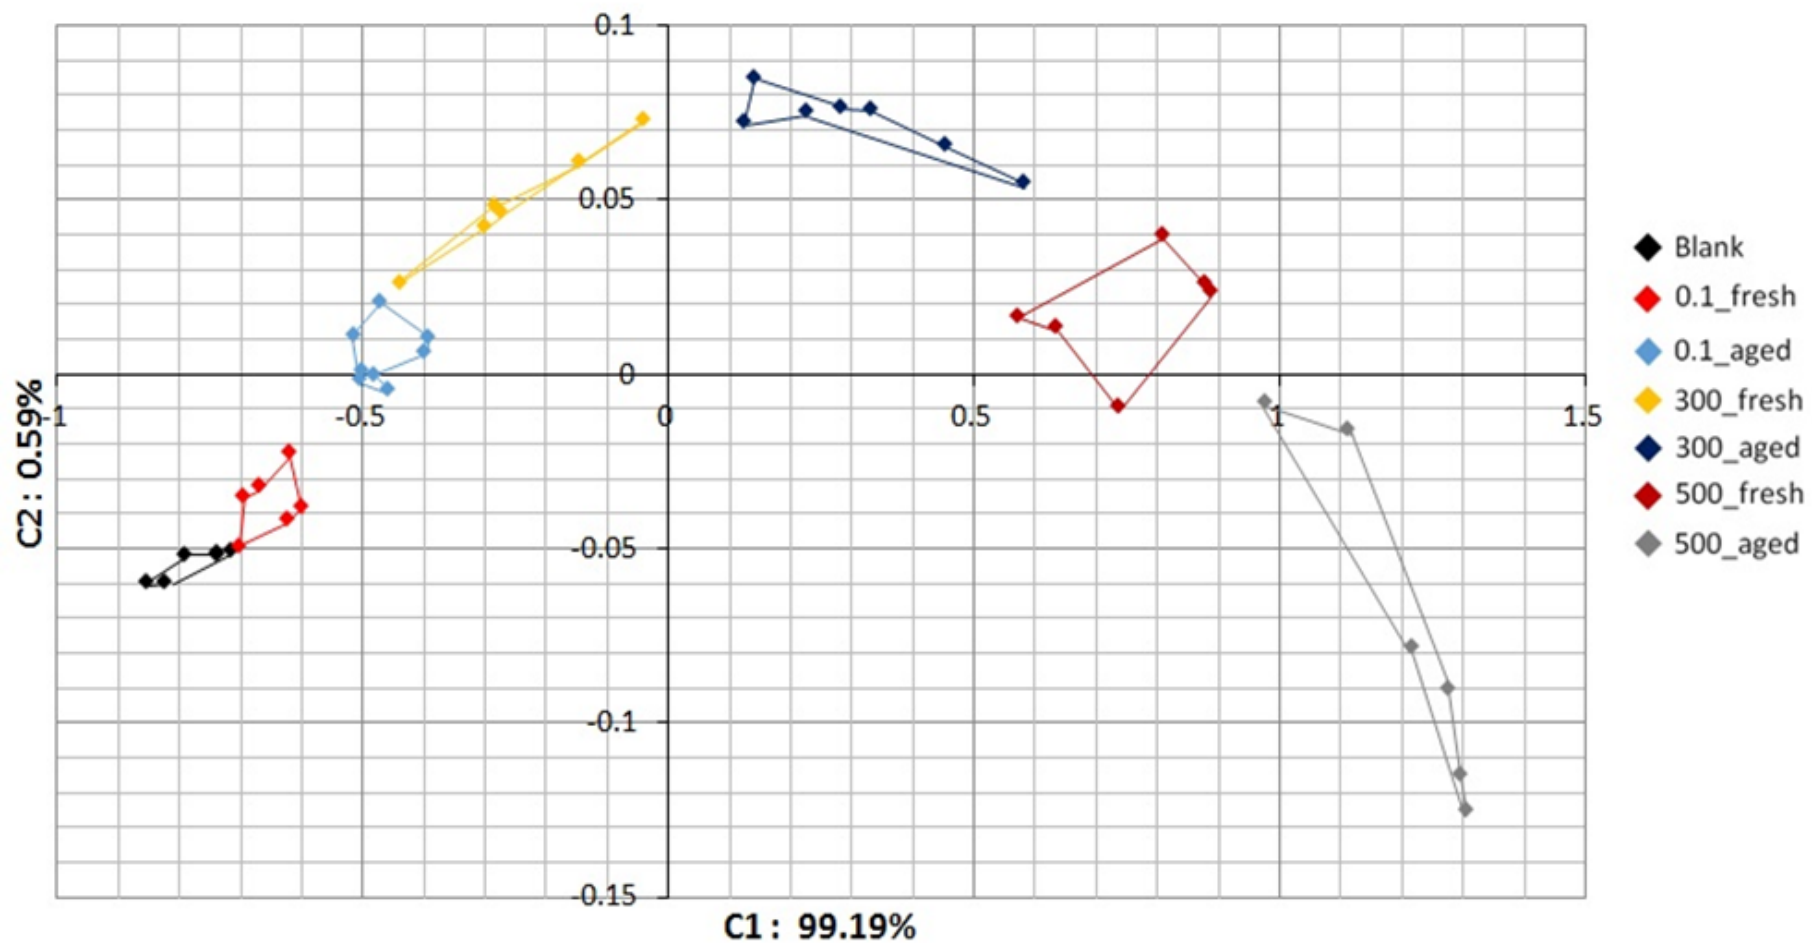

Supplement: ajas-31-8-1336-supplementary.pdf [file ajas-31-8-1336-supplementary.pdf]
